# Supplementary material
Source: PubMed Central journal article supplement (PMC3260011)
Supplement: NIHMS340869-supplement-Suppplemental_Data.pdf [file NIHMS340869-supplement-Suppplemental_Data.pdf]

## SUPPLEMENTARY DATA

### Optimized high-throughput screen for Hepatitis C viral translation inhibitors

Katherine E. Berry<sup>3</sup>, Betty Peng<sup>5</sup>, David Koditek<sup>5</sup>, Douglas Beeman<sup>5</sup>, Nikos Pagratis<sup>5</sup>, Jason Perry<sup>5</sup>, Jay Parish<sup>5</sup>, Weidong Zhong<sup>5</sup>, Jennifer A. Doudna<sup>1-4\*</sup> and I-hung Shih<sup>5\*</sup>

<sup>1</sup>Howard Hughes Medical Institute, <sup>2</sup>Department of Molecular and Cell Biology, <sup>3</sup>Department of Chemistry, University of California, Berkeley, CA 94720; <sup>4</sup>Physical Biosciences Division, Lawrence Berkeley National Laboratory, Berkeley, CA 94720; <sup>5</sup>Gilead Sciences, Inc., Foster City, CA 95616

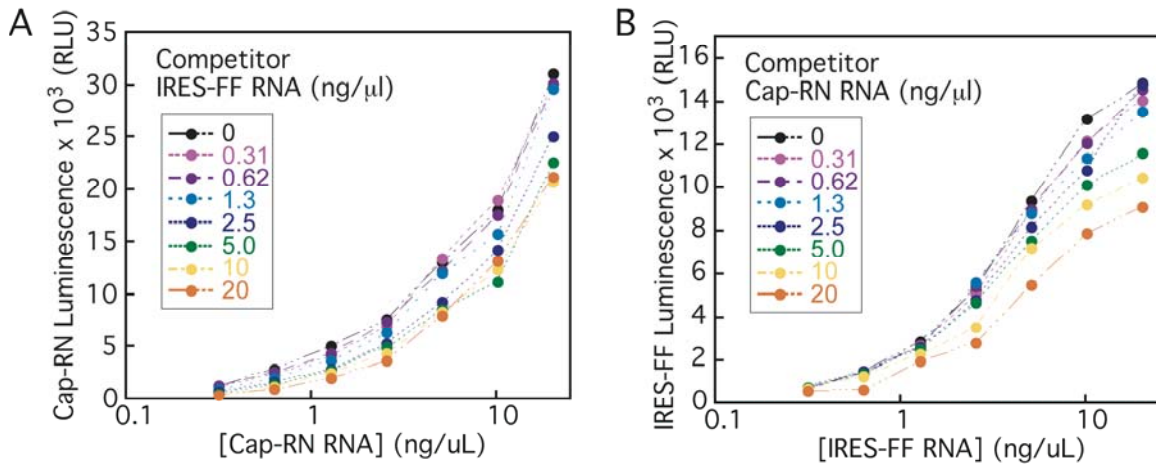

**Supplementary Figure 1.** Two-dimensional titrations of IRES-FF and 5' cap-RN mRNAs in adjusted RRL. The concentration of each of the two reporter mRNAs was varied between 0 ng/μl and 20 ng/μl and the absolute luminescence activities of (A) 5' cap-RN and (B) IRES-FF mRNA are plotted. Luciferase activities were measured using the BrightGlo system.

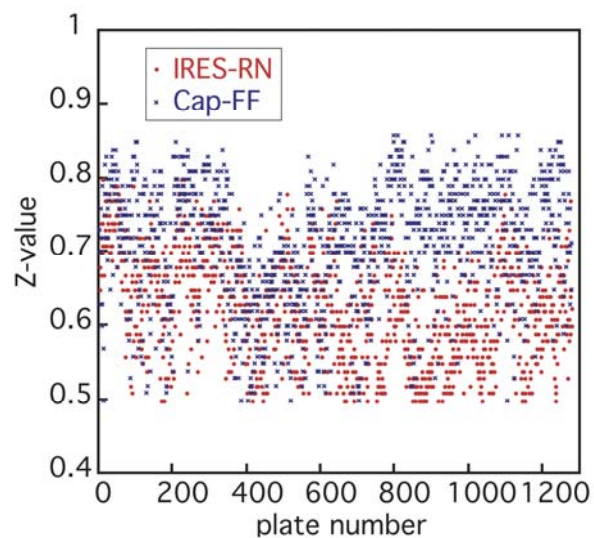

**Supplementary Figure 2.** Z values of all HTS plates. Z-factors were calculated as described in the materials and methods section. Average values for Z-factors were 0.625 and 0.713 for IRES-RN and 5' cap-FF translation, respectively.

**Supplemental Table 1.** NPI values of known translation inhibitors in the screen. Three known inhibitors of eukaryotic protein synthesis were present in the library. The NPI (%) of these compounds from the primary screen was calculated as described in the Materials and Methods section.

| <b>Inhibitor</b>                 | <b>NPI (%)</b> |                  |
|----------------------------------|----------------|------------------|
|                                  | <b>IRES-RN</b> | <b>5' cap-FF</b> |
| puromycin*<br>(positive control) | 100%           | 100%             |
| emitine                          | 92.2%          | 95.1%            |
| madumycin<br>derivative          | 41.7%          | 39.3%            |

\* Puromycin was used as the positive control for the screen. IC<sub>50</sub> values were determined to be 0.41  $\mu$ M against IRES-RN and 1.1  $\mu$ M against 5' cap-FF.

**Supplemental Table 2.** Examples of potent *Renilla* luciferase-specific inhibitors from the secondary screen. These compounds showed *Renilla* luciferase-specific inhibition to both *in vitro* translated *Renilla* luciferase (regardless of whether translation was driven by the IRES or a 5' cap) and recombinant *Renilla* luciferase. These compounds showed no inhibition of firefly luciferase at concentrations up to 100  $\mu$ M under the same conditions.

|  | IC <sub>50</sub> (REN) $\mu$ M | IC <sub>50</sub> (FF) $\mu$ M |
|--|--------------------------------|-------------------------------|
|  | 0.02                           | > 100                         |
|  | 0.10                           | > 100                         |
|  | 0.73                           | > 100                         |
|  | 1.44                           | > 100                         |

|                                                                                     |      |       |
|-------------------------------------------------------------------------------------|------|-------|
| 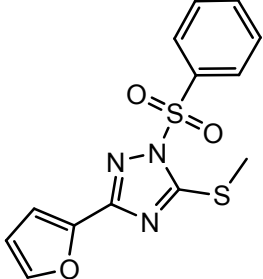   | 2.02 | > 100 |
|    | 2.24 | > 100 |
|    | 2.45 | > 100 |
|   | 2.98 | > 100 |
|  | 3.46 | > 100 |
|  | 5.12 | > 100 |
